# Supplementary material for: Nitric Oxide Mediation in Hydroxyurea and Nitric Oxide Metabolites’ Inhibition of Erythroid Progenitor Growth
Source: Biomolecules. 2021 Oct 21;11(11):1562. doi: 10.3390/biom11111562 (PMC8616001; doi:10.3390/biom11111562)
Supplement: Supplementary file 1 [file biomolecules-11-01562-s001.zip › biomolecules-1377585-supplementary.pdf]

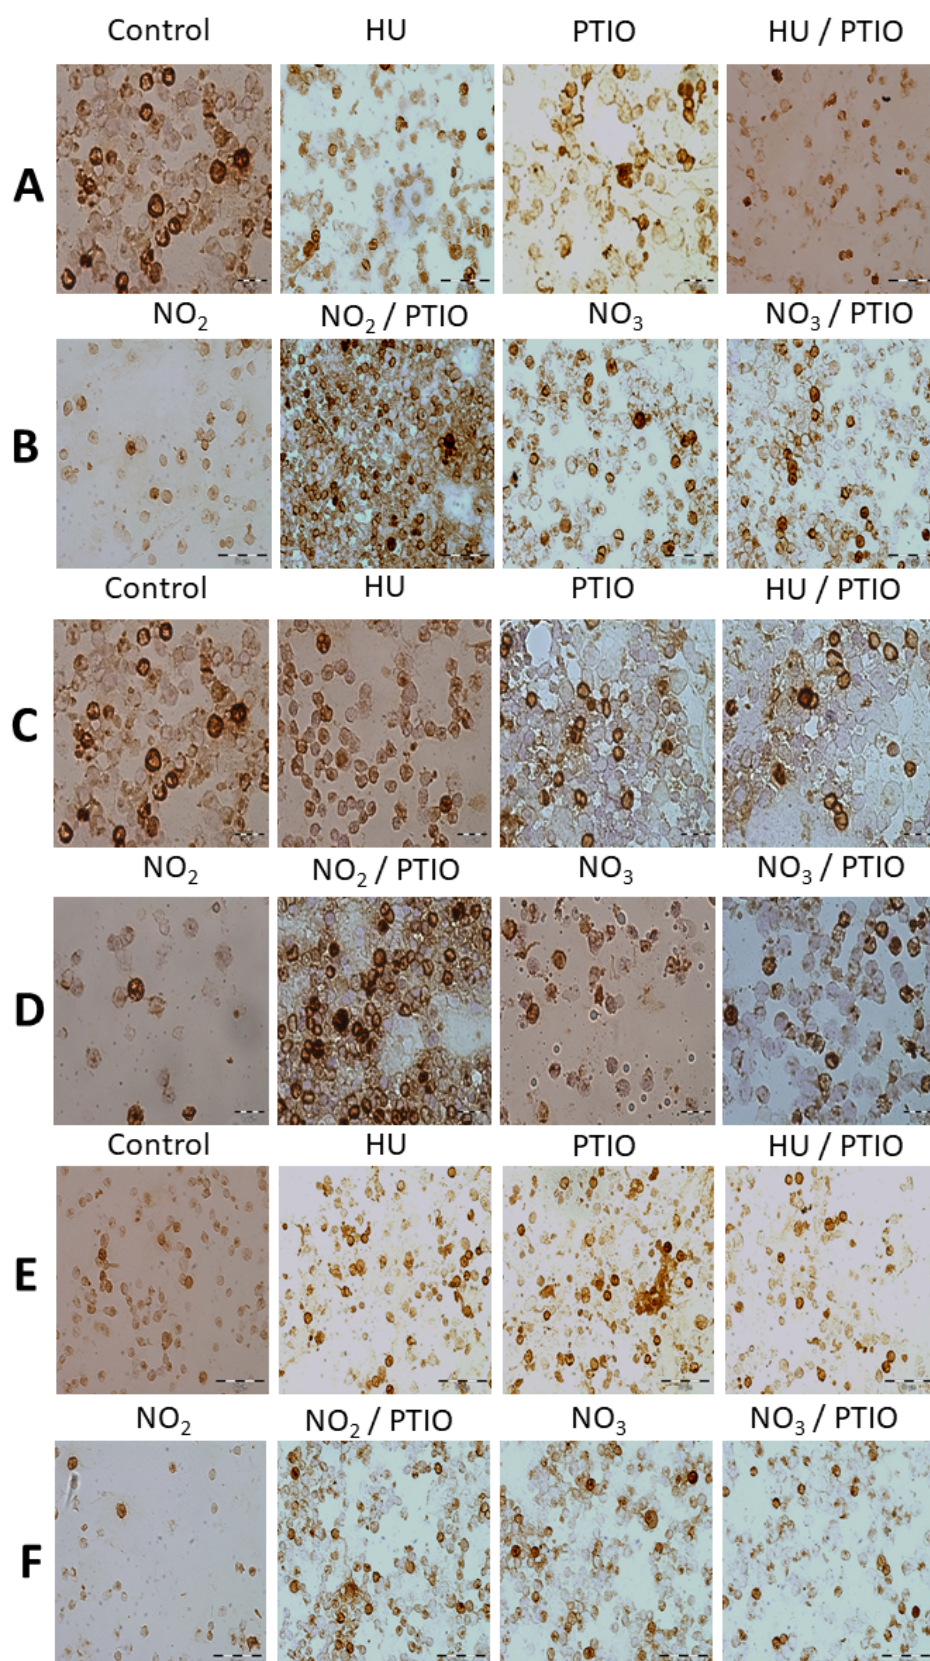

**Figure S1.** Immunocytochemistry slides correspond to Figure 4. Columns in graphs (A,C,E), while in graphs (B,D,F) correspond to NO<sub>2</sub>, NO<sub>2</sub>/PTIO, NO<sub>3</sub>, NO<sub>3</sub>/PTIO labelled columns.

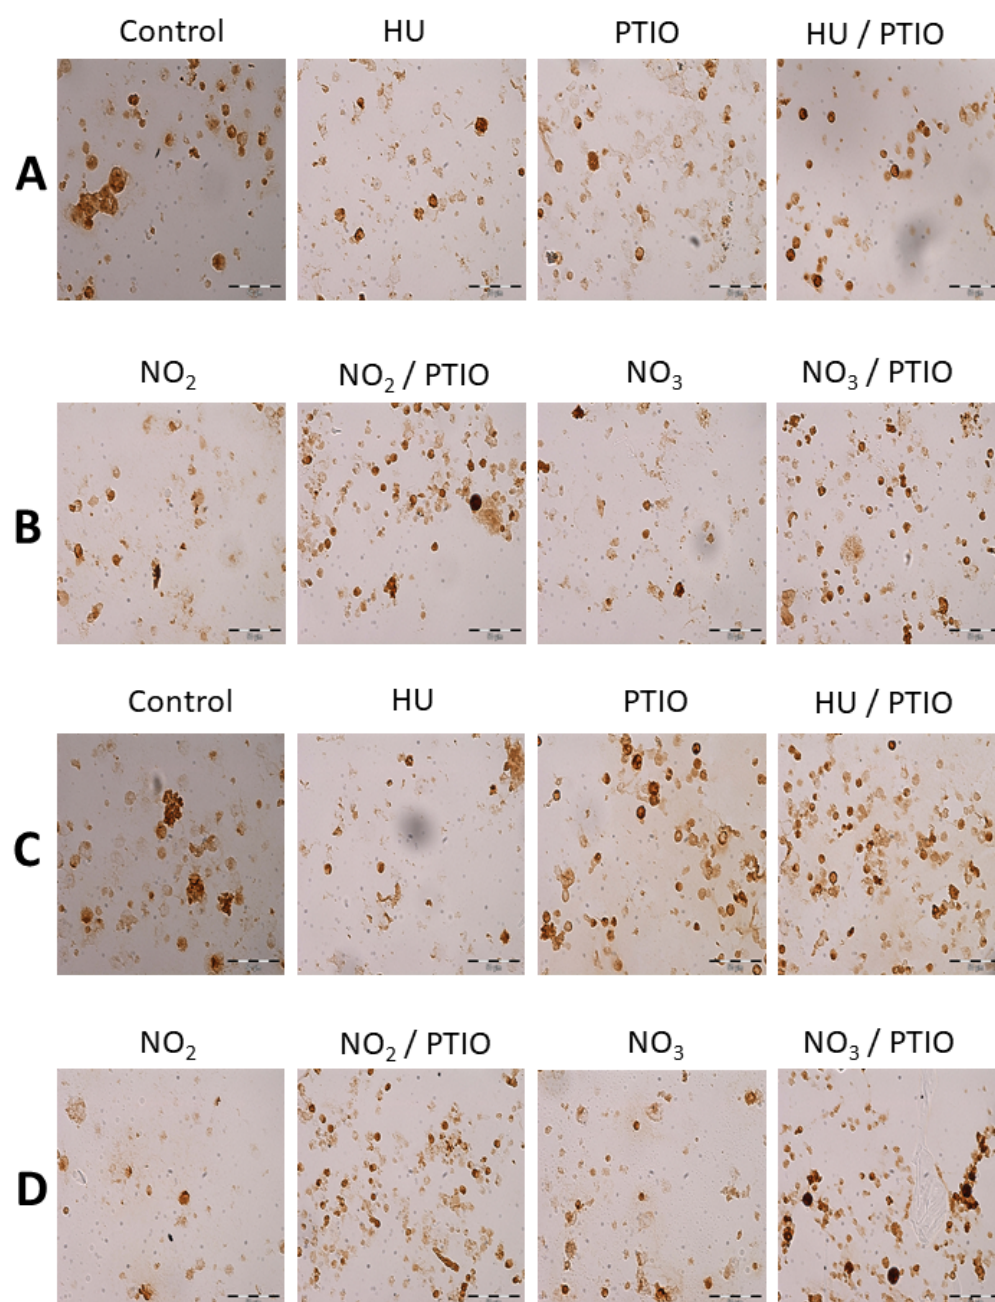

**Figure S2.** Immunocytochemistry slides correspond to Figure 5. Columns in graphs (A,C), while in graphs (B,D) correspond to NO<sub>2</sub>, NO<sub>2</sub>/PTIO, NO<sub>3</sub>, NO<sub>3</sub>/PTIO labelled columns.

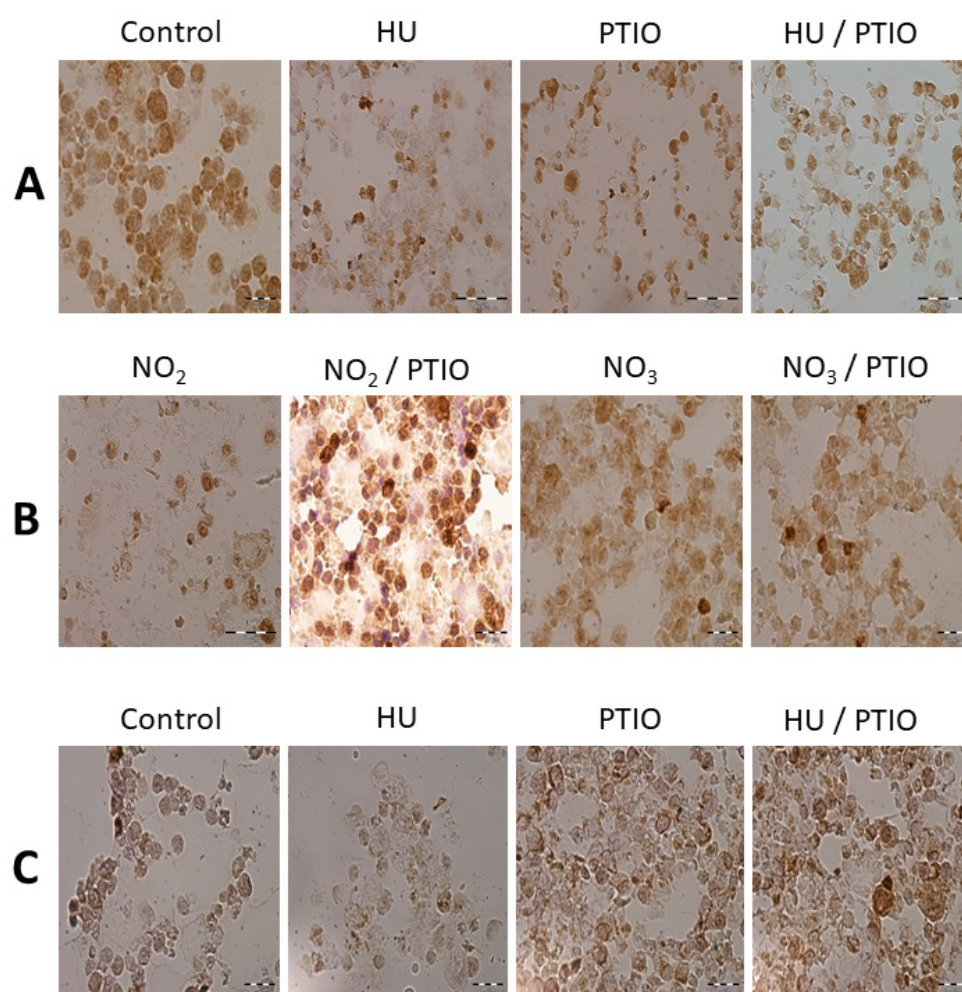

**Figure S3.** Immunocytochemistry slides correspond to Figure 6. Columns in graphs (A,C), while in graph (B) corresponds to NO<sub>2</sub>, NO<sub>2</sub>/PTIO, NO<sub>3</sub>, NO<sub>3</sub>/PTIO labelled columns.
